# Supplementary material
Source: publisher figshare collection journal article supplement (https://sage.figshare.com/ndownloader/files/22107687)
Supplement: Supplementary file 1 [file 22107687]

Supplementary Appendix

**What is the incidence of Complex Regional Pain Syndrome (CRPS) Type I within four months of a wrist fracture in the adult population? A systematic review.**

Catherine Rolls<sup>1</sup>, Candy McCabe<sup>2,3,4</sup>, Alison Llewellyn<sup>2,3</sup>, Gareth T Jones<sup>5</sup>

<sup>1</sup>Hand Rehabilitation Unit, University Hospitals Bristol

<sup>2</sup>Department of Nursing and Midwifery, University of the West of England, Bristol, UK

<sup>3</sup>CRPS Service, Royal United Hospitals Bath NHS Foundation Trust, Bath, UK

<sup>4</sup>The Florence Nightingale Foundation, London, UK

<sup>5</sup> Epidemiology Group, Aberdeen Centre for Arthritis and Musculoskeletal Health, University of Aberdeen, UK

## Contents

|                                               |    |
|-----------------------------------------------|----|
| Systematic Review Summary Protocol.....       | 3  |
| Systematic search Strategy.....               | 6  |
| Appendix                                      |    |
| A. Modified Newcastle Ottawa Scale (NOS)..... | 17 |
| B. Full scoring for the NOS.....              | 18 |

**What Is the incidence Of Complex Regional Pain Syndrome (CRPS) Type I within four months of a wrist fracture in the adult population?, A Systematic Review protocol.**

**Objectives**

The goal of this review is to establish the incidence of CRPS type I within 4 months of a wrist fracture in the adult population. We will document the diagnostic criteria used and, if applicable, discuss any discrepancies in incidence potentially arising from heterogeneity of diagnostic criteria.

**Criteria for Inclusion and Exclusion of Studies:**

**Types of studies**

- Observational studies published from 2010 onwards. To include prospective and retrospective cohort, studies as well as published audit or specialist epidemiological survey.

**Types of populations**

**Inclusion Criteria**

- Observational studies (as defined above) published after January 2010 with the stated aim of reporting on pain outcome following wrist fracture or injury. If conducted prior to 2010 must have been conducted no earlier than 2005. Studies to have been conducted in the following group of patients;
  - a) Adults (age 18 and over) who have sustained a wrist fracture. To be defined as a fracture of the distal radius +/- ulna or the carpals, including but not limited to the scaphoid.
  - b) The fracture can have been conservatively managed or internally fixated. If internally fixed this must have occurred within 3 weeks of the inciting event<sup>1</sup>.
- Studies that reported on the incidence of complex regional pain syndrome type I, Sudek's dystrophy, Algodystrophy, or Reflex Sympathetic Dystrophy. Or studies reporting on patient's that fulfil the Atkin's criteria. Must be able to be extract the primary data on specific location of CRPS and inciting incident.
- Retrospective studies or audits documenting the incidence of CRPS Type I in the first 4 months following wrist fracture.
- The authors must state how the diagnosis of CRPS was made in their patient group. Either;
  - 1. The diagnostic criteria they used or
  - 2. clinical presentation observed + outcome measures used that lead to a diagnosis of CRPS.

**Exclusion Criteria**

- Studies not published in full article format, or where the primary diagnostic data cannot be extracted from the paper or retrieved from the authors.

- Studies published in language other than English
  - Patients with the occurrence of CRPS following secondary or corrective procedures that occurred later than 3 weeks following the injury or using an external fixation device beyond three weeks of the fracture.
  - Patients with CRPS Type II
  - Children, to be defined as anyone under 18 at the time of their injury.
  - Fractures to the upper limb above the level of the wrist, or with wrist plus an upper arm injury.
  - Patients who have a previous history of CRPS, have a pre-existing neurological or chronic pain condition affecting their upper limb, and those with CRPS type II.
1. Current British Orthopaedic Association Standards for Trauma (BOAST) management of distal radius stipulate that a fracture should be fixed within 72 hours of injury, or from detection that the manipulated fracture position has slipped at the 2-week x-ray. We have rounded this up to three weeks.  
<https://www.boa.ac.uk/wp-content/uploads/2017/12/BOAST-Management-of-Distal-Radial-Fractures.pdf>
  2. The aim of the review is to identify incidence of CRPS occurring acutely after a wrist fracture. For patients wearing an external fixation device for longer than three weeks it is hard to establish whether the fracture of manipulation of the device are the trigger for CRPS. The authors have taken the decision to exclude this data.

#### Search strategy for Identification of Studies

##### Electronic Databases to be used

- MEDLINE
- EMBASE
- CINAHL
- BNI
- Psychinfo
- AMED

Search term: See Supplementary information Appendix B

##### Other Search methods

As well as database searching, the personal libraries of the research team will be manually searched for relevant studies, as will be the reference lists of articles brought up in the primary search.

|                                                                                                                                                                                                                                                                                                                                                                                                                                                                                                                                                                                                                                                                                                                                                                                                                                                                                                                                                                                                    |
|----------------------------------------------------------------------------------------------------------------------------------------------------------------------------------------------------------------------------------------------------------------------------------------------------------------------------------------------------------------------------------------------------------------------------------------------------------------------------------------------------------------------------------------------------------------------------------------------------------------------------------------------------------------------------------------------------------------------------------------------------------------------------------------------------------------------------------------------------------------------------------------------------------------------------------------------------------------------------------------------------|
| Method of Review                                                                                                                                                                                                                                                                                                                                                                                                                                                                                                                                                                                                                                                                                                                                                                                                                                                                                                                                                                                   |
| <p>Selection of studies</p> <p>In conjunction with a librarian trained in health research searching, we will search for the relevant papers and extract all references into a referencing management software. Each paper will then be allocated an identification number.</p> <p>All titles and abstracts will be evaluated against the inclusion/exclusion criteria, all those excluded will have a note on why excluded added. If it is unclear if the study is appropriate based on title and abstracts, then the full article will be reviewed.</p>                                                                                                                                                                                                                                                                                                                                                                                                                                           |
| <p>Assessment of methodological quality</p> <p>The methodological quality of studies selected will be established using Newcastle Ottawa Scale (NOS) for cohort studies.</p>                                                                                                                                                                                                                                                                                                                                                                                                                                                                                                                                                                                                                                                                                                                                                                                                                       |
| <p>Data Extraction</p> <p>Data to be collected:</p> <p>Setting/location and study period</p> <p>Study design (cohort/longitudinal, incidence survey, unclear, other)</p> <p>Data Source (Clinical data collected for study, Audit, Special survey/interview, Medical records)</p> <p>Study population (wrist fracture, upper limb fractures, colles fractures.)</p> <p>Other population characteristics (Age, sex, ethnicity, socioeconomic background)</p> <p>Number of patients</p> <p>Place studied (Medical facility, City/Province, National, Other)</p> <p>Are patients lost to follow-up documented (is there any record of DNA's from the clinic)</p> <p>What diagnostic criteria was used (Budapest, Veldman, IASP etc)</p> <p>Number of patients with a wrist fracture (as described in inclusion criteria)?</p> <p>Number of cases of CRPS type I within 4 months of a wrist fracture? (N.b if incidence is documented at varying time points record these in the comments section)</p> |
| <p>Data Synthesis</p> <p>The results are likely to be highly heterogenous so unable to do a quantitative or meta-analytic review. More likely to be tabulated and qualitative review</p>                                                                                                                                                                                                                                                                                                                                                                                                                                                                                                                                                                                                                                                                                                                                                                                                           |

## Systematic Search Strategy

| #  | Database | Search term                                                                                     | Results |
|----|----------|-------------------------------------------------------------------------------------------------|---------|
| 1  | Medline  | (complex regional pain syndrome).ti,ab                                                          | 2792    |
| 2  | Medline  | ("complex regional pain syndrome").ti,ab                                                        | 2735    |
| 3  | Medline  | (reflex sympathetic dystrophy).ti,ab                                                            | 1679    |
| 4  | Medline  | ("reflex sympathetic dystrophy").ti,ab                                                          | 1620    |
| 5  | Medline  | (Algodystrophy).ti,ab                                                                           | 429     |
| 6  | Medline  | (Sudeck*).ti,ab                                                                                 | 573     |
| 7  | Medline  | (causalgia).ti,ab                                                                               | 515     |
| 8  | Medline  | (Algoneurodystrophy).ti,ab                                                                      | 60      |
| 9  | Medline  | (Atkin* criteria).ti,ab                                                                         | 31      |
| 10 | Medline  | (1 OR 2 OR 3 OR 4 OR 5 OR 6 OR 7 OR 8 OR 9)                                                     | 5549    |
| 11 | Medline  | exp "COMPLEX REGIONAL PAIN SYNDROMES"/ OR exp CAUSALGIA/ OR exp "REFLEX SYMPATHETIC DYSTROPHY"/ | 5422    |
| 12 | Medline  | (10 OR 11)                                                                                      | 7309    |
| 13 | Medline  | (distal radius fracture).ti,ab                                                                  | 4220    |
| 14 | Medline  | ("distal radius fracture").ti,ab                                                                | 1451    |
| 15 | Medline  | (distal radius injur*).ti,ab                                                                    | 1781    |
| 16 | Medline  | (scaphoid fracture*).ti,ab                                                                      | 2246    |
| 17 | Medline  | (carpal fracture*).ti,ab                                                                        | 1889    |
| 18 | Medline  | (scaphoid injur*).ti,ab                                                                         | 948     |
| 19 | Medline  | (carpal injur*).ti,ab                                                                           | 1888    |

|           |                |                                                            |           |
|-----------|----------------|------------------------------------------------------------|-----------|
| 20        | Medline        | (colles fracture*).ti,ab                                   | 930       |
| 21        | Medline        | (wrist fractur*).ti,ab                                     | 5394      |
| 22        | Medline        | (wrist injur*).ti,ab                                       | 5183      |
| 23        | Medline        | (13 OR 14 OR 15 OR 16 OR 17 OR 18 OR 19 OR 20 OR 21 OR 22) | 15036     |
| 24        | Medline        | exp "RADIUS FRACTURES"/ OR exp "COLLES' FRACTURE"/         | 9303      |
| 25        | Medline        | (23 OR 24)                                                 | 20207     |
| 26        | Medline        | (12 AND 25)                                                | 358       |
| 27        | Medline        | 12 AND 25 [DT 2010-2019]                                   | 131       |
| 28        | Medline        | (inciden*).ti,ab                                           | 830080    |
| 29        | Medline        | (outcome*).ti,ab                                           | 1574795   |
| 30        | Medline        | (28 OR 29)                                                 | 2267061   |
| 31        | Medline        | exp INCIDENCE/                                             | 247427    |
| 32        | Medline        | (30 OR 31)                                                 | 2347482   |
| 33        | Medline        | (12 AND 25 AND 32)                                         | 123       |
| <b>34</b> | <b>Medline</b> | <b>12 AND 25 AND 32 [DT 2010-2019]</b>                     | <b>68</b> |
| 35        | PubMed         | (complex regional pain syndrome).ti,ab                     | 6615      |
| 36        | PubMed         | ("complex regional pain syndrome").ti,ab                   | 2800      |
| 37        | PubMed         | (reflex sympathetic dystrophy).ti,ab                       | 4127      |
| 38        | PubMed         | ("reflex sympathetic dystrophy").ti,ab                     | 4083      |
| 39        | PubMed         | (Algodystrophy).ti,ab                                      | 4219      |
| 40        | PubMed         | (Sudeck*).ti,ab                                            | 610       |

|           |               |                                                      |           |
|-----------|---------------|------------------------------------------------------|-----------|
| 41        | PubMed        | (causalgia).ti,ab                                    | 928       |
| 42        | PubMed        | (Algoneurodystrophy).ti,ab                           | 55        |
| 43        | PubMed        | (Atkin* criteria).ti,ab                              | 1506      |
| 44        | PubMed        | (35 OR 36 OR 37 OR 38 OR 39 OR 40 OR 41 OR 42 OR 43) | 8964      |
| 45        | PubMed        | (distal radius fracture).ti,ab                       | 1730      |
| 46        | PubMed        | ("distal radius fracture").ti,ab                     | 1730      |
| 47        | PubMed        | (distal radius injur*).ti,ab                         | 7         |
| 48        | PubMed        | (scaphoid fracture*).ti,ab                           | 1311      |
| 49        | PubMed        | (carpal fracture*).ti,ab                             | 198       |
| 50        | PubMed        | (scaphoid injur*).ti,ab                              | 52        |
| 51        | PubMed        | (carpal injur*).ti,ab                                | 172       |
| 52        | PubMed        | (colles fracture*).ti,ab                             | 1056      |
| 53        | PubMed        | (wrist fractur*).ti,ab                               | 1103      |
| 54        | PubMed        | (wrist injur*).ti,ab                                 | 6391      |
| 55        | PubMed        | (45 OR 46 OR 47 OR 48 OR 49 OR 50 OR 51 OR 52 OR 53) | 5242      |
| 56        | PubMed        | (44 AND 55)                                          | 143       |
| 57        | PubMed        | (inciden*).ti,ab                                     | 937020    |
| 58        | PubMed        | (outcome*).ti,ab                                     | 2325028   |
| 59        | PubMed        | (57 OR 58)                                           | 3058752   |
| <b>60</b> | <b>PubMed</b> | <b>(44 AND 55 AND 59)</b>                            | <b>67</b> |
| 61        | EMBASE        | (complex regional pain syndrome).ti,ab               | 4051      |



|    |        |                                                                                           |       |
|----|--------|-------------------------------------------------------------------------------------------|-------|
| 62 | EMBASE | ("complex regional pain syndrome").ti,ab                                                  | 4051  |
| 63 | EMBASE | (reflex sympathetic dystrophy).ti,ab                                                      | 2045  |
| 64 | EMBASE | ("reflex sympathetic dystrophy").ti,ab                                                    | 2045  |
| 65 | EMBASE | (Algodystrophy).ti,ab                                                                     | 575   |
| 66 | EMBASE | (Sudeck*).ti,ab                                                                           | 457   |
| 67 | EMBASE | (causalgia).ti,ab                                                                         | 493   |
| 68 | EMBASE | (Algoneurodystrophy).ti,ab                                                                | 64    |
| 69 | EMBASE | (Atkin* criteria).ti,ab                                                                   | 1     |
| 70 | EMBASE | (61 OR 62 OR 63 OR 64 OR 65 OR 66 OR 67 OR 68 OR 69)                                      | 6989  |
| 71 | EMBASE | exp "COMPLEX REGIONAL PAIN SYNDROME TYPE I"/<br>OR exp "COMPLEX REGIONAL PAIN SYNDROMES"/ | 8985  |
| 72 | EMBASE | (70 OR 71)                                                                                | 10273 |
| 73 | EMBASE | (distal radius fracture).ti,ab                                                            | 1689  |
| 74 | EMBASE | ("distal radius fracture").ti,ab                                                          | 1689  |
| 75 | EMBASE | (distal radius injur*).ti,ab                                                              | 9     |
| 76 | EMBASE | (scaphoid fracture*).ti,ab                                                                | 1442  |
| 77 | EMBASE | (carpal fracture*).ti,ab                                                                  | 170   |
| 78 | EMBASE | (scaphoid injur*).ti,ab                                                                   | 57    |
| 79 | EMBASE | (carpal injur*).ti,ab                                                                     | 161   |
| 80 | EMBASE | (colles fracture*).ti,ab                                                                  | 860   |
| 81 | EMBASE | (wrist fractur*).ti,ab                                                                    | 1267  |

|           |               |                                                                                                                                                               |            |
|-----------|---------------|---------------------------------------------------------------------------------------------------------------------------------------------------------------|------------|
| 82        | EMBASE        | (wrist injur*).ti,ab                                                                                                                                          | 637        |
| 83        | EMBASE        | (73 OR 74 OR 75 OR 76 OR 77 OR 78 OR 79 OR 80 OR 81 OR 82)                                                                                                    | 5834       |
| 84        | EMBASE        | exp "RADIUS FRACTURE"/ OR exp "WRIST FRACTURE"/ OR exp "DISTAL RADIUS FRACTURE"/ OR exp "BARTON FRACTURE"/ OR exp "COLLES FRACTURE"/ OR exp "SMITH FRACTURE"/ | 16266      |
| 85        | EMBASE        | (83 OR 84)                                                                                                                                                    | 17591      |
| 86        | EMBASE        | (72 AND 85)                                                                                                                                                   | 581        |
| 87        | EMBASE        | 72 AND 85 [DT 2010-2019]                                                                                                                                      | 293        |
| 88        | EMBASE        | (inciden*).ti,ab                                                                                                                                              | 1178176    |
| 89        | EMBASE        | (outcome*).ti,ab                                                                                                                                              | 2367517    |
| 90        | EMBASE        | (88 OR 89)                                                                                                                                                    | 3316241    |
| 91        | EMBASE        | exp INCIDENCE/                                                                                                                                                | 447348     |
| 92        | EMBASE        | (90 OR 91)                                                                                                                                                    | 3434256    |
| 93        | EMBASE        | (72 AND 85 AND 92)                                                                                                                                            | 232        |
| <b>94</b> | <b>EMBASE</b> | <b>72 AND 85 AND 92 [DT 2010-2019]</b>                                                                                                                        | <b>154</b> |
| 95        | PsycINFO      | (complex regional pain syndrome).ti,ab                                                                                                                        | 640        |
| 96        | PsycINFO      | ("complex regional pain syndrome").ti,ab                                                                                                                      | 636        |
| 97        | PsycINFO      | (reflex sympathetic dystrophy).ti,ab                                                                                                                          | 123        |
| 98        | PsycINFO      | ("reflex sympathetic dystrophy").ti,ab                                                                                                                        | 116        |
| 99        | PsycINFO      | (Algodystrophy).ti,ab                                                                                                                                         | 0          |
| 100       | PsycINFO      | (Sudeck*).ti,ab                                                                                                                                               | 16         |

|               |                                                                      |        |
|---------------|----------------------------------------------------------------------|--------|
| 101 PsyclINFO | (causalgia).ti,ab                                                    | 56     |
| 102 PsyclINFO | (Algoneurodystrophy).ti,ab                                           | 0      |
| 103 PsyclINFO | (Atkin* criteria).ti,ab                                              | 41     |
| 104 PsyclINFO | (95 OR 96 OR 97 OR 98 OR 99 OR 100 OR 101 OR 102 OR 103)             | 804    |
| 105 PsyclINFO | exp "COMPLEX REGIONAL PAIN SYNDROME (TYPE I)"/                       | 149    |
| 106 PsyclINFO | (104 OR 105)                                                         | 807    |
| 107 PsyclINFO | (distal radius fracture).ti,ab                                       | 26     |
| 108 PsyclINFO | ("distal radius fracture").ti,ab                                     | 12     |
| 109 PsyclINFO | (distal radius injur*).ti,ab                                         | 8      |
| 110 PsyclINFO | (scaphoid fracture*).ti,ab                                           | 3      |
| 111 PsyclINFO | (carpal fracture*).ti,ab                                             | 6      |
| 112 PsyclINFO | (scaphoid injur*).ti,ab                                              | 1      |
| 113 PsyclINFO | (carpal injur*).ti,ab                                                | 52     |
| 114 PsyclINFO | (colles fracture*).ti,ab                                             | 8      |
| 115 PsyclINFO | (wrist fractur*).ti,ab                                               | 87     |
| 116 PsyclINFO | (wrist injur*).ti,ab                                                 | 219    |
| 117 PsyclINFO | (107 OR 108 OR 109 OR 110 OR 111 OR 112 OR 113 OR 114 OR 115 OR 116) | 367    |
| 118 PsyclINFO | (106 AND 117)                                                        | 18     |
| 119 PsyclINFO | 106 AND 117 [DT 2010-2019]                                           | 8      |
| 120 PsyclINFO | (inciden*).ti,ab                                                     | 77242  |
| 121 PsyclINFO | (outcome*).ti,ab                                                     | 372822 |

|            |                 |                                                                               |          |
|------------|-----------------|-------------------------------------------------------------------------------|----------|
| 122        | PsycINFO        | (120 OR 121)                                                                  | 440500   |
| 123        | PsycINFO        | (106 AND 118 AND 122)                                                         | 4        |
| <b>124</b> | <b>PsycINFO</b> | <b>106 AND 118 AND 122 [DT 2010-2019]</b>                                     | <b>3</b> |
| 125        | CINAHL          | (complex regional pain syndrome).ti,ab                                        | 1448     |
| 126        | CINAHL          | ("complex regional pain syndrome").ti,ab                                      | 1412     |
| 127        | CINAHL          | (reflex sympathetic dystrophy).ti,ab                                          | 376      |
| 128        | CINAHL          | ("reflex sympathetic dystrophy").ti,ab                                        | 372      |
| 129        | CINAHL          | (Algodystrophy).ti,ab                                                         | 19       |
| 130        | CINAHL          | (Sudeck*).ti,ab                                                               | 14       |
| 131        | CINAHL          | (causalgia).ti,ab                                                             | 86       |
| 132        | CINAHL          | (Algoneurodystrophy).ti,ab                                                    | 5        |
| 133        | CINAHL          | (Atkin* criteria).ti,ab                                                       | 12       |
| 134        | CINAHL          | (125 OR 126 OR 127 OR 128 OR 129 OR 130 OR 131 OR 132 OR 133)                 | 1810     |
| 135        | CINAHL          | exp "COMPLEX REGIONAL PAIN SYNDROMES"/ OR exp "REFLEX SYMPATHETIC DYSTROPHY"/ | 1958     |
| 136        | CINAHL          | (134 OR 135)                                                                  | 2394     |
| 137        | CINAHL          | (distal radius fracture).ti,ab                                                | 0        |
| 138        | CINAHL          | ("distal radius fracture").ti,ab                                              | 438      |
| 139        | CINAHL          | (distal radius injur*).ti,ab                                                  | 453      |
| 140        | CINAHL          | (scaphoid fracture*).ti,ab                                                    | 440      |
| 141        | CINAHL          | (carpal fracture*).ti,ab                                                      | 298      |
| 142        | CINAHL          | (scaphoid injur*).ti,ab                                                       | 199      |

|                  |                                  |           |
|------------------|----------------------------------|-----------|
| 143CINAHL        | (carpal injur*).ti,ab            | 459       |
| 144CINAHL        | (colles fracture*).ti,ab         | 121       |
| 145CINAHL        | (wrist fractur*).ti,ab           | 1473      |
| 146CINAHL        | (wrist injur*).ti,ab             | 1669      |
| 147CINAHL        | (137 OR 138 OR 139 OR 140        | 4110      |
|                  | OR 141 OR 142 OR 143 OR          |           |
|                  | 144 OR 145 OR 146)               |           |
| 148CINAHL        | exp "RADIUS FRACTURES"/          | 2153      |
| 149CINAHL        | (147 OR 148)                     | 5176      |
| 150CINAHL        | (136 AND 149)                    | 82        |
| 151CINAHL        | (136 and 149) [DT 2010-2019]     | 49        |
| 152CINAHL        | (inciden*).ti,ab                 | 169243    |
| 153CINAHL        | (outcome*).ti,ab                 | 552531    |
| 154CINAHL        | (152 OR 153)                     | 681658    |
| 155CINAHL        | exp INCIDENCE/                   | 61514     |
| 156CINAHL        | (154 OR 155)                     | 704166    |
| 157CINAHL        | (136 AND 149 AND 156)            | 36        |
| <b>158CINAHL</b> | <b>(136 and 149 and 156) [DT</b> | <b>28</b> |
|                  | <b>2010-2019]</b>                |           |
| 159BNI           | (complex regional pain           | 55        |
|                  | syndrome).ti,ab                  |           |
| 160BNI           | ("complex regional pain          | 54        |
|                  | syndrome").ti,ab                 |           |
| 161BNI           | (reflex sympathetic              | 35        |
|                  | dystrophy).ti,ab                 |           |
| 162BNI           | ("reflex sympathetic             | 35        |
|                  | dystrophy").ti,ab                |           |
| 163BNI           | (Algodystrophy).ti,ab            | 4         |
| 164BNI           | (Sudeck*).ti,ab                  | 2         |

|         |                                                                      |       |
|---------|----------------------------------------------------------------------|-------|
| 165BNI  | (causalgia).ti,ab                                                    | 12    |
| 166BNI  | (Algoneurodystrophy).ti,ab                                           | 0     |
| 167BNI  | (Atkin* criteria).ti,ab                                              | 1     |
| 168BNI  | (159 OR 160 OR 161 OR 162 OR 163 OR 164 OR 165 OR 166 OR 167)        | 91    |
| 169BNI  | (distal radius fracture).ti,ab                                       | 30    |
| 170BNI  | ("distal radius fracture").ti,ab                                     | 8     |
| 171BNI  | (distal radius injur*).ti,ab                                         | 12    |
| 172BNI  | (scaphoid fracture*).ti,ab                                           | 20    |
| 173BNI  | (carpal fracture*).ti,ab                                             | 8     |
| 174BNI  | (scaphoid injur*).ti,ab                                              | 10    |
| 175BNI  | (carpal injur*).ti,ab                                                | 25    |
| 176BNI  | (colles fracture*).ti,ab                                             | 29    |
| 177BNI  | (wrist fractur*).ti,ab                                               | 92    |
| 178BNI  | (wrist injur*).ti,ab                                                 | 65    |
| 179BNI  | (169 OR 170 OR 171 OR 172 OR 173 OR 174 OR 175 OR 176 OR 177 OR 178) | 207   |
| 180BNI  | (168 AND 179)                                                        | 2     |
| 181BNI  | (inciden*).ti,ab                                                     | 22271 |
| 182BNI  | (outcome*).ti,ab                                                     | 73061 |
| 183BNI  | (181 OR 182)                                                         | 90907 |
| 184BNI  | (168 AND 179 AND 183)                                                | 0     |
| 185AMED | (complex regional pain syndrome).ti,ab                               | 182   |

|         |                                                                      |      |
|---------|----------------------------------------------------------------------|------|
| 186AMED | ("complex regional pain syndrome").ti,ab                             | 182  |
| 187AMED | (reflex sympathetic dystrophy).ti,ab                                 | 143  |
| 188AMED | ("reflex sympathetic dystrophy").ti,ab                               | 143  |
| 189AMED | (Algodystrophy).ti,ab                                                | 8    |
| 190AMED | (Sudeck*).ti,ab                                                      | 8    |
| 191AMED | (causalgia).ti,ab                                                    | 15   |
| 192AMED | (Algoneurodystrophy).ti,ab                                           | 0    |
| 193AMED | (Atkin* criteria).ti,ab                                              | 0    |
| 194AMED | (185 OR 186 OR 187 OR 188 OR 189 OR 190 OR 191 OR 192 OR 193)        | 318  |
| 195AMED | (distal radius fracture).ti,ab                                       | 27   |
| 196AMED | ("distal radius fracture").ti,ab                                     | 27   |
| 197AMED | (distal radius injur*).ti,ab                                         | 0    |
| 198AMED | (scaphoid fracture*).ti,ab                                           | 11   |
| 199AMED | (carpal fracture*).ti,ab                                             | 1    |
| 200AMED | (scaphoid injur*).ti,ab                                              | 0    |
| 201AMED | (carpal injur*).ti,ab                                                | 0    |
| 202AMED | (colles fracture*).ti,ab                                             | 33   |
| 203AMED | (wrist fractur*).ti,ab                                               | 39   |
| 204AMED | (wrist injur*).ti,ab                                                 | 30   |
| 205AMED | (195 OR 196 OR 197 OR 198 OR 199 OR 200 OR 201 OR 202 OR 203 OR 204) | 134  |
| 206AMED | (inciden*).ti,ab                                                     | 4656 |

|         |                                         |       |
|---------|-----------------------------------------|-------|
| 207AMED | (outcome*).ti,ab                        | 31091 |
| 208AMED | (206 OR 207)                            | 34744 |
| 209AMED | (194 AND 205 AND 208)                   | 1     |
| 210AMED | (194 and 205 and 208) [DT<br>2010-2019] | 0     |



## Appendix A: Modified NOS

| Assessment of quality of a cohort study – Newcastle Ottawa Scale                                                                                       |   |                          |
|--------------------------------------------------------------------------------------------------------------------------------------------------------|---|--------------------------|
| <b>Selection</b> (tick one box in each section)                                                                                                        |   |                          |
| 1. Representativeness of the intervention cohort                                                                                                       |   |                          |
| a) truly representative of the <u>average, wrist fracture population</u>                                                                               | ★ | <input type="checkbox"/> |
| b) somewhat representative of the <u>average, wrist fracture population</u>                                                                            | ★ | <input type="checkbox"/> |
| c) selected group of patients, <u>e.g. only certain wrist fracture groups ie conservative or surgically managed</u>                                    |   | <input type="checkbox"/> |
| d) no description of the derivation of the cohort                                                                                                      |   | <input type="checkbox"/> |
| 2. Selection of the non intervention cohort : Omitted                                                                                                  |   |                          |
| 3. Ascertainment of intervention                                                                                                                       |   |                          |
| a) secure record (eg health care record)                                                                                                               | ★ | <input type="checkbox"/> |
| b) structured interview                                                                                                                                | ★ | <input type="checkbox"/> |
| c) written self report                                                                                                                                 |   | <input type="checkbox"/> |
| d) other / no description                                                                                                                              |   | <input type="checkbox"/> |
| 4. Demonstration that outcome of interest (CRPS) was not present at start of study                                                                     |   |                          |
| a) yes                                                                                                                                                 | ★ | <input type="checkbox"/> |
| b) no                                                                                                                                                  |   | <input type="checkbox"/> |
| <b>Comparability</b> (Omitted)                                                                                                                         |   |                          |
| <b>Outcome</b> (tick one box in each section)                                                                                                          |   |                          |
| 1. Assessment of outcome                                                                                                                               |   |                          |
| a) independent blind assessment                                                                                                                        | ★ | <input type="checkbox"/> |
| b) record linkage                                                                                                                                      | ★ | <input type="checkbox"/> |
| c) self report                                                                                                                                         |   | <input type="checkbox"/> |
| d) other / no description                                                                                                                              |   | <input type="checkbox"/> |
| 2. Was follow up long enough for outcomes to occur                                                                                                     |   |                          |
| a) yes <u>Over 8 weeks</u>                                                                                                                             | ★ | <input type="checkbox"/> |
| b) no <u>less than 8 weeks</u>                                                                                                                         |   | <input type="checkbox"/> |
| 3. Adequacy of follow up of cohorts                                                                                                                    |   |                          |
| a) complete follow up: all subjects accounted for                                                                                                      | ★ | <input type="checkbox"/> |
| b) subjects lost to follow up unlikely to introduce bias: number lost <= 20%, or description of those lost suggesting no different from those followed | ★ | <input type="checkbox"/> |
| c) follow up rate < 80% (select an adequate %) and no description of those lost                                                                        |   | <input type="checkbox"/> |
| d) no statement                                                                                                                                        |   | <input type="checkbox"/> |

## Appendix B: Full scoring for NOS

|                            | Selection                                                                                                                                                                 |                                                                                                    |                                                                 | Outcome                                              |                                    |                                                                                                             |             |
|----------------------------|---------------------------------------------------------------------------------------------------------------------------------------------------------------------------|----------------------------------------------------------------------------------------------------|-----------------------------------------------------------------|------------------------------------------------------|------------------------------------|-------------------------------------------------------------------------------------------------------------|-------------|
| Paper                      | Representativeness                                                                                                                                                        | Ascertainment                                                                                      | Demonstration                                                   | Assessment                                           | Follow-up (f/u)                    | Adequacy                                                                                                    | Total score |
| <b>Farzad<sup>29</sup></b> | Consecutive wrist fracture patients enrolled, roughly 50:50 male to female ratio (surgical and conservative) who were referred to physio. Considered as a Selected group. | Wrist fractures were enrolled post fracture reduction following referral by an orthopaedic surgeon | previous neurology not clearly documented                       | Budapest criteria                                    | f/u for 8 weeks consider adequate. | 3 patients lost to the 1 year follow-up but all included in the 8 week review which is relevant to this SLR |             |
| stars                      | 0                                                                                                                                                                         | 1                                                                                                  | 0                                                               | 1                                                    | 1                                  | 1                                                                                                           | 4           |
| <b>Zyluk<sup>24</sup></b>  | Unclear how the cohort was selected from the wider wrist fracture cohort. All had K-wire fixation for 6 weeks. = A selected group                                         | All patients had a surgical intervention, so ascertained from health record.                       | No record of exclusion categories at all.                       | Used IASP and CRPS severity scale with one assessor. | 6 and 12 weeks                     | high number of subjects lost                                                                                |             |
| stars                      | 0                                                                                                                                                                         | 1                                                                                                  | 0                                                               | 1                                                    | 1                                  | 0                                                                                                           | 3           |
| <b>Roh<sup>30</sup></b>    | Surgically treated patients only, and at a major trauma centre. Selective group of patients so bias that more severe fractures may have higher incidence.                 | All patients had surgical intervention so good ascertainment from medical records.                 | Exclusion criteria includes previous upper extremity conditions | Budapest criteria                                    | 6, 12 and 24 weeks                 | not stated                                                                                                  |             |
| stars                      | 0                                                                                                                                                                         | 1                                                                                                  | 1                                                               | 1                                                    | 1                                  | 0                                                                                                           | 4           |

|                                |                                                                                                                   |                                                                        |                                                                                                                                             |                                                               |                                    |                                                                                               |   |
|--------------------------------|-------------------------------------------------------------------------------------------------------------------|------------------------------------------------------------------------|---------------------------------------------------------------------------------------------------------------------------------------------|---------------------------------------------------------------|------------------------------------|-----------------------------------------------------------------------------------------------|---|
| <b>Dilek<sup>25</sup></b>      | Small sample and from conservative management only. Selected group                                                | Ascertainment of fracture would be by medical records and observation. | No detail of exclusion of prior neurology                                                                                                   | Assessed with the IASP                                        | f/u for 8 weeks consider adequate. | Yes all subjects accounted for, 7 of 57 lost = 12%                                            |   |
| stars                          | 0                                                                                                                 | 1                                                                      | 0                                                                                                                                           | 1                                                             | 1                                  | 1                                                                                             | 4 |
| <b>Hall<sup>14</sup></b>       | Small sample but conservative and surgically managed patients so somewhat representative                          | Health record                                                          | exclusion of any condition that precluded bilateral comparison (of which CRPS/neuro would count)                                            | Assessed with the IASP                                        | 10-12 weeks                        | 94 % attendance at second review, reasons for withdrawal stated.                              |   |
| Stars                          | 1                                                                                                                 | 1                                                                      | 1                                                                                                                                           | 1                                                             | 1                                  | 1                                                                                             | 6 |
| <b>Beerthuisen<sup>8</sup></b> | Large study with conservative and surgical management. Exclude comminuted fractures but otherwise representative. | Health record                                                          | Prior CRPS not excluded and is documented in the results. Unable to disentangle these patients from those who developed CRPS in this study. | Three diagnostic criteria used (IASP, Veldman, Harden&Bruehl) | 6 weeks 12 weeks and 1 year        | Some loss to follow up but minimal and unlikely to introduce bias as demographical ly similar |   |
| Stars                          | 1                                                                                                                 | 1                                                                      | 0                                                                                                                                           | 1                                                             | 1                                  | 1                                                                                             | 5 |
| <b>Moseley<sup>26</sup></b>    | Large study with conservative only, selected group                                                                | Health record                                                          | Prior CRPS is documented                                                                                                                    | IASP                                                          | 4 months                           | minimal loss to follow up                                                                     |   |

|                                                                                                                                                                        |                                                                                                                                                                                                                               |               |                                                                                      |                               |                |                            |   |
|------------------------------------------------------------------------------------------------------------------------------------------------------------------------|-------------------------------------------------------------------------------------------------------------------------------------------------------------------------------------------------------------------------------|---------------|--------------------------------------------------------------------------------------|-------------------------------|----------------|----------------------------|---|
| Stars                                                                                                                                                                  | 0                                                                                                                                                                                                                             | 1             | 1                                                                                    | 1                             | 1              | 1                          | 5 |
| <b>Jellad</b> <sup>27</sup>                                                                                                                                            | Small sample of conservatively managed extra-articular fractures who attended physio (selective group)                                                                                                                        | Health record | concomitant injuries of the upper limb to be excluded                                | Veldman <sup>a</sup>          | 3 and 6 months | All subjects accounted for |   |
| Stars                                                                                                                                                                  | 0                                                                                                                                                                                                                             | 1             | 1                                                                                    | 0                             | 1              | 1                          | 4 |
| <b>Jesswani</b> <sup>31</sup>                                                                                                                                          | Closed distal radius fractures, but no comment on how fracture was managed. Selective group. More male than female patients with a relatively young mean age. No documentation of how patients were sampled i.e consecutively | Health record | exclusion of pre-existing upper limb disability (can assume that would include CRPS) | IASP and physical examination | 16 weeks       | No statement               |   |
| Stars                                                                                                                                                                  | 0                                                                                                                                                                                                                             | 1             | 1                                                                                    | 1                             | 1              | 0                          | 4 |
| Notes: (a) Referenced Beerthuisen <sup>8</sup> as reason for choosing the Veldman. This paper recommends use of the Budapest criteria. Likely to be institutional bias |                                                                                                                                                                                                                               |               |                                                                                      |                               |                |                            |   |
